# Supplementary material
Source: PubMed Central journal article supplement (PMC5743476)
Supplement: EHP945.s001.acco.pdf [file EHP945.s001.acco.pdf]

**Note to readers with disabilities:** *EHP* strives to ensure that all journal content is accessible to all readers. However, some figures and Supplemental Material published in *EHP* articles may not conform to [508 standards](#) due to the complexity of the information being presented. If you need assistance accessing journal content, please contact [ehponline@niehs.nih.gov](mailto:ehponline@niehs.nih.gov). Our staff will work with you to assess and meet your accessibility needs within 3 working days.

## **Supplemental Material**

# **Ambient Temperature and Stillbirth: A Multicenter Retrospective Cohort Study**

Sandie Ha, Danping Liu, Yeyi Zhu, Sung Soo Kim, Seth Sherman, Katherine L. Grantz, and Pauline Mendola

### **Table of Contents**

---

|          |                                                                                                                                                                                                            |
|----------|------------------------------------------------------------------------------------------------------------------------------------------------------------------------------------------------------------|
| Table S1 | Distribution of Temperature During Different Pregnancy Windows in the Consortium on Safe Labor, 2002-2008                                                                                                  |
| Table S2 | Distribution of Absolute Temperature by Site and Pregnancy Windows in the Consortium on Safe Labor, 2001-2008                                                                                              |
| Table S3 | Chronic Associations Between Extreme Ambient Temperatures and Stillbirth by Type of Stillbirth in the Consortium on Safe Labor, 2002-2008 (cohort analysis)                                                |
| Table S4 | Sensitivity Analysis Results of Chronic Associations Between Extreme Ambient Temperatures and Stillbirth Among Singleton Births in the Consortium on Safe Labor, 2002-2008 (Matched Case-control Analysis) |
| Table S5 | Acute Association Between Ambient Temperature During the Week Prior and Stillbirth Among Cases by Type of Stillbirth in the Consortium on Safe Labor, 2002-2008                                            |
| Table S6 | Population Attributable Fraction (PAF) Associated With Chronic Exposure to Extreme Ambient Temperature by Type of Stillbirth in the Consortium on Safe Labor, 2002-2008                                    |

**Table S1: Distribution of Temperature During Different Pregnancy Windows in the Consortium on Safe Labor, 2002-2008.**

| Exposure window                     | Stillbirth        |             | No stillbirth     |                          |
|-------------------------------------|-------------------|-------------|-------------------|--------------------------|
|                                     | n                 | %           | n                 | %                        |
| <b>Chronic exposure<sup>a</sup></b> |                   |             |                   |                          |
| Preconception                       |                   |             |                   |                          |
| Cold                                | 122               | 12.3        | 22,266            | 10.0                     |
| Mild                                | 781               | 78.7        | 177,857           | 80.0                     |
| Hot                                 | 89                | 9.0         | 22,260            | 10.0                     |
| Trimester 1                         |                   |             |                   |                          |
| Cold                                | 9                 | 9.8         | 22,299            | 10.0                     |
| Mild                                | 820               | 82.7        | 177,814           | 80.0                     |
| Hot                                 | 75                | 7.6         | 22,270            | 10.0                     |
| Whole pregnancy                     |                   |             |                   |                          |
| Cold                                | 247               | 24.9        | 22,095            | 9.9                      |
| Mild                                | 507               | 51.1        | 178,194           | 80.1                     |
| Hot                                 | 238               | 24.0        | 22,094            | 9.9                      |
| <b>Acute exposure<sup>b</sup></b>   |                   |             |                   |                          |
|                                     | Mean <sup>c</sup> | (min,max)   | Mean <sup>d</sup> | (min,max)                |
| Warm season (May-Sept)              | 21.2              | 5.3, 29.9   | 20.8              | 2.8, 30.3 <sup>c</sup>   |
| Cold season (Oct-Apr)               | 9.0               | -14.3, 28.1 | 8.9               | -12.9, 29.5 <sup>c</sup> |

<sup>a</sup>The distribution is presented as frequency (percent). Cold, mild and hot were defined as <10<sup>th</sup>, 10-90<sup>th</sup>, and >90<sup>th</sup> percentile of the distribution of temperature by site.

<sup>b</sup>The distribution is presented as mean (min, max) expressed in C°. Estimates are based on 987 first stillbirths.

<sup>c</sup>Data based on case period, which was the week preceding stillbirth delivery.

<sup>d</sup>Data based on control periods, which are two weeks before and after stillbirth delivery.

**Table S2. Distribution of Absolute Temperature by Site and Pregnancy Windows in the Consortium on Safe Labor, 2002-2008.**

| Site                                           | Pregnancy windows <sup>a</sup> | Average daily temperature distribution<br>(°C) |      |      |      |      |
|------------------------------------------------|--------------------------------|------------------------------------------------|------|------|------|------|
|                                                |                                | Min                                            | P10  | P50  | P90  | Max  |
| 1-Baystate Medical Center, Massachusetts       | Preconception                  | -6.7                                           | -2.6 | 10.2 | 19.3 | 20.5 |
|                                                | Trimester 1                    | -6.3                                           | -3.1 | 8.9  | 19.1 | 20.3 |
|                                                | Trimester 2                    | -7.0                                           | -3.0 | 7.8  | 18.8 | 21.2 |
|                                                | Whole pregnancy                | -2.3                                           | 4.6  | 8.1  | 12.3 | 17.4 |
| 2-Cedars-Sinai Medical Center, California      | Preconception                  | 12.6                                           | 13.5 | 18.2 | 22.1 | 24.2 |
|                                                | Trimester 1                    | 12.8                                           | 13.4 | 17.6 | 22.1 | 24.0 |
|                                                | Trimester 2                    | 12.8                                           | 13.5 | 16.8 | 22.0 | 24.1 |
|                                                | Whole pregnancy                | 13.6                                           | 16.1 | 17.4 | 19.1 | 22.3 |
| 3-Christiana Care Health System, Delaware      | Preconception                  | 0.8                                            | 3.3  | 14.3 | 24.2 | 25.0 |
|                                                | Trimester 1                    | 0.9                                            | 3.3  | 12.1 | 24.1 | 24.8 |
|                                                | Trimester 2                    | 0.8                                            | 3.9  | 13.9 | 24.0 | 25.6 |
|                                                | Whole pregnancy                | 5.5                                            | 10.6 | 13.7 | 17.4 | 22.2 |
| 4-Indiana University - Clarian Health, Indiana | Preconception                  | -0.5                                           | 1.7  | 13.7 | 22.0 | 23.1 |
|                                                | Trimester 1                    | -0.4                                           | 1.4  | 9.5  | 21.7 | 22.8 |
|                                                | Trimester 2                    | -1.6                                           | 1.6  | 11.5 | 22.0 | 23.2 |
|                                                | Whole pregnancy                | 3.2                                            | 8.8  | 11.5 | 15.3 | 20.6 |
| 5-Intermountain HealthCare, Utah               | Preconception                  | -4.2                                           | -0.4 | 11.1 | 19.7 | 22.2 |
|                                                | Trimester 1                    | -4.5                                           | -1.4 | 8.7  | 19.5 | 22.1 |
|                                                | Trimester 2                    | -4.7                                           | -1.5 | 6.8  | 19.1 | 24.4 |
|                                                | Whole pregnancy                | -0.5                                           | 5.1  | 8.5  | 12.2 | 19.1 |
| 6-Maimonides Medical Center, New York          | Preconception                  | -2.3                                           | 1.3  | 13.8 | 23.3 | 24.3 |
|                                                | Trimester 1                    | -0.8                                           | 1.5  | 12.9 | 23.1 | 24.0 |
|                                                | Trimester 2                    | -1.6                                           | 1.6  | 11.7 | 22.7 | 24.4 |
|                                                | Whole pregnancy                | 3.3                                            | 8.9  | 12.0 | 16.1 | 21.6 |
| 7-MedStar Health, Maryland                     | Preconception                  | 0.1                                            | 3.2  | 14.4 | 23.1 | 24.5 |
|                                                | Trimester 1                    | 1.1                                            | 3.6  | 14.1 | 22.9 | 24.2 |
|                                                | Trimester 2                    | 0.3                                            | 3.7  | 12.6 | 22.7 | 25.0 |
|                                                | Whole pregnancy                | 5.0                                            | 10.0 | 13.0 | 16.7 | 21.8 |
| 8-MetroHealth Medical Center, Ohio             | Preconception                  | -1.7                                           | 0.0  | 10.4 | 20.3 | 21.5 |
|                                                | Trimester 1                    | -1.2                                           | 0.1  | 9.2  | 19.9 | 21.3 |
|                                                | Trimester 2                    | -2.4                                           | 0.1  | 9.9  | 19.7 | 21.3 |
|                                                | Whole pregnancy                | 1.9                                            | 6.7  | 9.9  | 13.5 | 18.7 |
| 9-Summa Health System, Ohio                    | Preconception                  | -3.1                                           | 0.3  | 12.0 | 19.9 | 21.4 |
|                                                | Trimester 1                    | -2.8                                           | -0.3 | 10.2 | 19.7 | 21.2 |
|                                                | Trimester 2                    | -2.7                                           | -0.3 | 8.7  | 19.6 | 21.7 |
|                                                | Whole pregnancy                | 1.4                                            | 6.5  | 9.3  | 13.3 | 18.4 |
| 10-University of Illinois at Chicago, Illinois | Preconception                  | -3.3                                           | -0.4 | 8.7  | 19.2 | 21.6 |
|                                                | Trimester 1                    | -3.0                                           | -0.9 | 7.2  | 18.7 | 21.4 |
|                                                | Trimester 2                    | -4.7                                           | -1.0 | 7.5  | 18.7 | 22.0 |
|                                                | Whole pregnancy                | -0.3                                           | 5.0  | 8.6  | 12.0 | 18.3 |
| 11-University of Miami, Florida                | Preconception                  | 20.4                                           | 21.2 | 25.0 | 28.5 | 29.0 |
|                                                | Trimester 1                    | 20.5                                           | 21.3 | 25.0 | 28.5 | 29.0 |
|                                                | Trimester 2                    | 20.4                                           | 21.4 | 25.3 | 28.5 | 29.0 |
|                                                | Whole pregnancy                | 21.9                                           | 23.8 | 25.1 | 26.4 | 28.2 |

|                               |                 |      |      |      |      |      |
|-------------------------------|-----------------|------|------|------|------|------|
| 12-University of Texas, Texas | Preconception   | 12.9 | 14.8 | 22.6 | 27.9 | 28.7 |
|                               | Trimester 1     | 12.9 | 14.6 | 21.7 | 27.8 | 28.6 |
|                               | Trimester 2     | 12.5 | 14.8 | 21.9 | 27.7 | 28.8 |
|                               | Whole pregnancy | 15.3 | 19.2 | 21.3 | 24.1 | 27.4 |

Abbreviations: C, Celsius; P, percentile

<sup>a</sup>Preconception: 91 days prior to estimated last menstrual period (eLMP), first trimester: eLMP-13 weeks, whole pregnancy: eLMP-date of delivery.

**Table S3. Chronic Associations Between Extreme Ambient Temperatures and Stillbirth by Type of Stillbirth in the Consortium on Safe Labor, 2002-2008 (cohort analysis).**

| Pregnancy windows        | Intrapartum (n=96) |            | Antepartum (n=896) |            |
|--------------------------|--------------------|------------|--------------------|------------|
|                          | OR <sup>a</sup>    | 95% CI     | OR <sup>a</sup>    | 95% CI     |
| Hot                      |                    |            |                    |            |
| Preconception            | 0.63               | 0.28, 1.43 | 1.01               | 0.79, 1.29 |
| Trimester 1              | 0.77               | 0.32, 1.84 | 0.81               | 0.62, 1.06 |
| Trimester 2 <sup>b</sup> | -                  | -          | 1.04               | 0.80, 1.35 |
| Whole Pregnancy          | 4.75               | 2.38, 9.46 | 3.80               | 3.16, 4.57 |
| Cold                     |                    |            |                    |            |
| Preconception            | 1.16               | 0.58, 2.34 | 1.16               | 0.93, 1.45 |
| Trimester 1              | 1.41               | 0.71, 2.80 | 0.85               | 0.66, 1.08 |
| Trimester 2 <sup>b</sup> | -                  | -          | 0.86               | 0.64, 1.17 |
| Whole Pregnancy          | 5.78               | 3.53, 9.46 | 4.83               | 3.97, 5.86 |

Abbreviations: OR, odds ratio; CI, confidence interval

<sup>a</sup> Adjusted for clustering resulting from multiple singleton deliveries within the same mother and potential confounders including site, infant sex, maternal age, race, marital status, parity, prepregnancy BMI, hypertensive disorders of pregnancy, insurance status, humidity, particulate matter with diameter <2.5 microns, ozone, and season of conception.

<sup>b</sup> Analyses were based on pregnancies that completed the 2<sup>nd</sup> trimester (631 antepartum stillbirths). Intrapartum stillbirth analyses did not converge due to low number of cases (n=33).

**Table S4. Sensitivity Analysis Results of Chronic Associations Between Extreme Ambient Temperatures and Stillbirth Among Singleton Births in the Consortium on Safe Labor, 2002-2008 (Matched Case-control Analysis).**

| <b>Pregnancy windows</b>     | <b>OR<sup>a</sup></b> | <b>95% CI</b> |
|------------------------------|-----------------------|---------------|
| Hot                          |                       |               |
| Preconception                | 0.86                  | 0.66 ,1.14    |
| Trimester 1                  | 0.78                  | 0.59 ,1.04    |
| Trimester 2                  | 1.24                  | 0.97, 1.59    |
| Whole Pregnancy <sup>b</sup> | 4.29                  | 3.22 ,5.72    |
| Cold                         |                       |               |
| Preconception                | 1.14                  | 0.88 ,1.47    |
| Trimester 1                  | 0.97                  | 0.75 ,1.25    |
| Trimester 2                  | 1.02                  | 0.78, 1.32    |
| Whole Pregnancy <sup>b</sup> | 2.96                  | 2.21 ,3.96    |

<sup>a</sup>ORs were obtained using conditional logistic regression adjusted for all covariates except study site and air pollutants.

<sup>b</sup>At a given gestational age, whole pregnancy exposure was truncated among controls to match that of the case.

**Table S5. Acute Association Between Ambient Temperature During the Week Prior and Stillbirth Among Cases by Type of Stillbirth in the Consortium on Safe Labor, 2002-2008 (Case-crossover analysis).**

|             | Season of delivery | n   | OR <sup>a</sup> |           | AR <sup>b</sup> |           | AR <sup>c</sup> |          |
|-------------|--------------------|-----|-----------------|-----------|-----------------|-----------|-----------------|----------|
|             |                    |     | Estimate        | 95% CI    | Estimate        | 95% CI    | Estimate        | 95%CI    |
| Intrapartum | Cold (Oct-Apr)     | 50  | 1.02            | 0.96,1.08 | 1.1             | -2.8,5.1  | 0.8             | -2.0,3.7 |
|             | Warm (May-Sept)    | 45  | 1.05            | 0.95,1.17 | 3.2             | -3.2,10.4 | 2.3             | -2.3,7.5 |
| Antepartum  | Cold (Oct-Apr)     | 490 | 1.00            | 0.98,1.02 | 0.1             | -1.2,1.4  | 0.1             | -0.9,1.0 |
|             | Warm (May-Sept)    | 402 | 1.06            | 1.03,1.10 | 3.8             | 1.8,5.9   | 2.7             | 1.3,4.3  |

Abbreviations: OR, odds ratio; CI, confidence interval; AR, attributable risk

<sup>a</sup>The ORs for case-crossover models are obtained from conditional logistic regression with robust standard errors where only cases were selected and they act as their own controls. Estimates are for one degree Celsius increase in ambient temperature adjusted for relative humidity and time invariant confounders.

<sup>b</sup>Calculated using US background rate as  $I_u$ ; risk is expressed as per 10,000 births

<sup>c</sup>Calculated using study specific background rate during specific season as  $I_u$ ; risk is expressed as per 10,000 births

**Table S6. Population Attributable Fraction (PAF) Associated With Chronic Exposure to Extreme Ambient Temperature by Type of Stillbirth in the Consortium on Safe Labor, 2002-2008.**

| Whole pregnancy temperature |      | PAF <sup>a</sup> | 95% CI     | Total cases | Excess cases <sup>b</sup> | 95% CI     |
|-----------------------------|------|------------------|------------|-------------|---------------------------|------------|
| Antepartum                  | Cold | 0.19             | 0.18,0.20  | 219         | 42.4                      | 40.0, 44.4 |
|                             | Hot  | 0.18             | 0.16 ,0.19 | 215         | 38.0                      | 35.3, 40.3 |
| Intrapartum                 | Cold | 0.24             | 0.21,0.26  | 28          | 6.8                       | 5.9, 7.3   |
|                             | Hot  | 0.19             | 0.14,0.21  | 23          | 4.4                       | 3.2, 4.9   |

Abbreviations: PAF, population attributable fraction; CI, confidence interval

<sup>a</sup>PAF was calculated using the formula:  $PAF = \frac{OR - 1}{OR}$ , expressed as a proportion.

<sup>b</sup>Expressed as per 100,000 births
